# Supplementary material for: Genome-wide characterization and expression analysis of GRAS gene family in pepper (Capsicum annuum L.)
Source: PeerJ. 2018 May 29;6:e4796. doi: 10.7717/peerj.4796 (PMC5983004; doi:10.7717/peerj.4796)
Supplement: Supplemental Information 1 [file peerj-06-4796-s001.xlsx]

## Sheet: Gene list
Table S1: Gene list from Arabidopsis, tomato and rice
Arabidopsis		tomato		rice
Gene Accession	Gene Name	Gene Accession	Gene Name	Gene Accession	Gene Name
AT1G07520.1	SCL31	Solyc01g008910.2.1	SlGRAS1	LOC_Os01g45860.1	OsGRAS1
AT1G07530.1	SCL14	Solyc01g009840.1.1	SlGRAS2	LOC_Os01g62460.1	OsGRAS2
AT1G14920.1	GAI	Solyc01g059950.1.1	SlGRAS3	LOC_Os01g65900.1	OsGRAS3
AT1G21450.1	SCL1	Solyc01g059960.1.1	SlGRAS4	LOC_Os01g67650.1	OsGRAS4
AT1G50420.1	SCL3	Solyc01g079370.2.1	SlGRAS5	LOC_Os01g67670.1	OsGRAS5
AT1G50600.1	SCL5	Solyc01g079380.1.1	SlGRAS6	LOC_Os01g71970.1	OsGRAS6
AT1G55580.1	LAS	Solyc01g090950.2.1	SlGRAS7	LOC_Os02g10360.1	OsGRAS7
AT1G63100.1	SCL28	Solyc01g100200.2.1	SlGRAS8	LOC_Os02g44360.1	OsGRAS8
AT1G66350.1	RGL1	Solyc02g085340.1.1	SlGRAS9	LOC_Os02g44370.1	OsGRAS9
AT2G01570.1	RGA	Solyc02g085600.1.1	SlGRAS10	LOC_Os02g45760.1	OsGRAS10
AT2G04890.1	SCL21	Solyc02g092370.1.1	SlGRAS11	LOC_Os03g09280.2	OsGRAS11
AT2G29060.1	SCL33	Solyc02g092570.1.1	SlGRAS12	LOC_Os03g15680.1	OsGRAS12
AT2G37650.1	SCL9	Solyc02g094340.1.1	SlGRAS13	LOC_Os03g29480.1	OsGRAS13
AT2G45160.1	SCL27	Solyc03g025170.1.1	SlGRAS14	LOC_Os03g31880.1	OsGRAS14
AT3G03450.1	RGL2	Solyc03g110950.1.1	SlGRAS15	LOC_Os03g40080.1	OsGRAS15
AT3G13840.1	SCL29	Solyc03g123400.1.1	SlGRAS16	LOC_Os03g48450.1	OsGRAS16
AT3G46600.1	SCL30	Solyc04g014830.1.1	SlGRAS17	LOC_Os03g49990.1	OsGRAS17
AT3G49950.1	SCL32	Solyc04g064550.1.1	SlGRAS18	LOC_Os03g51330.1	OsGRAS18
AT3G50650.1	SCL7	Solyc05g053090.1.1	SlGRAS19	LOC_Os04g35250.1	OsGRAS19
AT3G54220.1	SCR	Solyc05g053420.1.1	SlGRAS20	LOC_Os04g46860.1	OsGRAS20
AT3G60630.1	SCL22	Solyc05g054170.2.1	SlGRAS21	LOC_Os04g49110.1	OsGRAS21
AT4G00150.1	SCL6	Solyc06g009610.1.1	SlGRAS22	LOC_Os04g50060.1	OsGRAS22
AT4G08250.1	SCL26	Solyc06g035620.2.1	SlGRAS23	LOC_Os05g31380.1	OsGRAS23
AT4G17230.1	SCL13	Solyc06g036170.1.1	SlGRAS24	LOC_Os05g31420.1	OsGRAS24
AT4G36710.1	SCL15	Solyc06g076280.1.1	SlGRAS25	LOC_Os05g40710.1	OsGRAS25
AT4G37650.1	SHR	Solyc06g082530.1.1	SlGRAS26	LOC_Os05g42130.1	OsGRAS26
AT5G17490.1	RGL3	Solyc07g043330.1.1	SlGRAS27	LOC_Os05g49930.1	OsGRAS27
AT5G41920.1	SCL23	Solyc07g047950.1.1	SlGRAS28	LOC_Os06g01620.1	OsGRAS28
AT5G48150.1	PAT1	Solyc07g052960.1.1	SlGRAS29	LOC_Os06g03710.1	OsGRAS29
AT5G52510.1	SCL8	Solyc07g063940.1.1	SlGRAS30	LOC_Os06g40780.1	OsGRAS30
AT5G59450.1	SCL11	Solyc07g065270.1.1	SlGRAS31	LOC_Os07g16330.1	OsGRAS31
AT5G66770.1	SCL4	Solyc07g066250.1.1	SlGRAS32	LOC_Os07g36170.2	OsGRAS32
		Solyc08g014030.1.1	SlGRAS33	LOC_Os07g38030.1	OsGRAS33
Table S2. The RPKM value of each gene in different tissues and development stages
Gene_id	Leaf	Solyc08g080400.1.1	SlGRAS35	LOC_Os07g39820.1	OsGRAS35	PC_B	PC_B5	PC_B10	PL_6DPA	PL_16DPA	PL_25DPA	PL_MG	PL_B	PL_B5	PL_B10
CaGRAS13	0	Solyc09g010920.1.1	SlGRAS36	LOC_Os07g40020.1	OsGRAS36	0.657	1.655	0.523	0	0.158	0.114	0	0	0.082	0
CaGRAS15	0	Solyc09g018460.1.1	SlGRAS37	LOC_Os10g22430.1	OsGRAS37	0	0	0	0	0	0	0	0	0	0
CaGRAS18	0	Solyc09g066450.1.1	SlGRAS38	LOC_Os10g40390.1	OsGRAS38	0	0	0	0	0	0	0	0	0	0
CaGRAS21	0	Solyc10g074680.1.1	SlGRAS39	LOC_Os11g03110.1	OsGRAS39	0	0	0	0	0	0	0	0	0	0
CaGRAS24	0	Solyc10g086370.1.1	SlGRAS40	LOC_Os11g04400.1	OsGRAS40	0	0	0	0	0.409	0	0	0	0	0
CaGRAS27	0	Solyc10g086380.1.1	SlGRAS41	LOC_Os11g04570.1	OsGRAS41	0	0	0	0	0	0	0	0	0	0
CaGRAS36	0	Solyc10g086530.1.1	SlGRAS42	LOC_Os11g04590.1	OsGRAS42	0	0	0	0	0	0	0.43	0	0	0
CaGRAS39	0	Solyc11g005610.1.1	SlGRAS43	LOC_Os11g06180.1	OsGRAS43	0	0	0	0	0	0	0	0	0	0
CaGRAS4	0	Solyc11g011260.1.1	SlGRAS44	LOC_Os11g11600.1	OsGRAS44	0	0	0	0	0	0	0	0	0	0
CaGRAS42	0	Solyc11g012510.1.1	SlGRAS45	LOC_Os11g31100.1	OsGRAS45	0	0	0	0	0	0	0	0	0	0
CaGRAS44	0	Solyc11g013150.1.1	SlGRAS46	LOC_Os11g47870.1	OsGRAS46	0.06	0	0.102	0.112	0.109	0.675	0.128	0	0	0.083
CaGRAS50	0	Solyc11g017100.1.1	SlGRAS47	LOC_Os11g47890.1	OsGRAS47	0.311	0	0.264	0.328	4.589	3.39	1.945	1.466	0.966	1.141
CaGRAS43	1.594	Solyc12g005340.1.1	SlGRAS48	LOC_Os11g47900.1	OsGRAS48	0	0	0	0	0	0.088	0	0	0	0
CaGRAS35	1.704	Solyc12g049320.1.1	SlGRAS49	LOC_Os11g47910.1	OsGRAS49	0	0	0	0	0	0	0	0	0	0
CaGRAS49	0.088	Solyc12g099220.1.1	SlGRAS50	LOC_Os11g47920.1	OsGRAS50	0.22	0.19	0.153	0.107	2.47	3.513	0.998	0.925	0.815	0.85
CaGRAS20	0	Solyc12g099900.1.1	SlGRAS51	LOC_Os12g02870.1	OsGRAS51	2.807	1.503	2.871	0	0.43	0.776	2.031	0.736	2.345	4.622
CaGRAS2	2.789			LOC_Os12g04200.1	OsGRAS52	2.674	0.773	1.676	1.403	0.446	0	0	0	0	0.668
CaGRAS17	0.107			LOC_Os12g04370.1	OsGRAS53	0.259	0.433	0.057	0.26	0.655	1.117	1.96	0.86	0.597	0.288
CaGRAS45	0			LOC_Os12g04380.1	OsGRAS54	0	0.051	0.146	0.192	0.226	0.082	0.275	0	0.293	0
CaGRAS47	0.072			LOC_Os12g06540.1	OsGRAS55	0.049	0.155	0.269	0.356	0.487	0.075	0	0	0.054	0.139
CaGRAS1	1.823			LOC_Os12g38490.1	OsGRAS56	0.149	0.079	0.465	1.544	0.474	0.121	1.193	5.539	0.894	0.227
CaGRAS7	1.662					3.618	4.108	5.627	4.382	2.28	6.13	4.497	3.634	4.554	4.839
CaGRAS12	28.705					30.782	39.339	7.851	6.882	13.262	10.938	6.505	4.797	3.394	3.702
CaGRAS9	24.436					12.241	10.505	11.808	6.784	8.864	11.043	11.279	7.83	5.445	7.089
CaGRAS40	8.448					0.962	2.414	2.327	6.754	2.206	2.974	1.864	2.215	1.919	1.35
CaGRAS19	17.395					1.336	3.082	5.791	3.794	2.162	1.853	0.867	0.782	7.182	10.817
CaGRAS31	2.509					1.637	1.608	2.246	4.113	2.325	4.283	6.735	4.378	6.817	6.645
CaGRAS10	1.893					0.182	0.061	0	1.083	1.277	1.532	2.407	1.072	0	0.083
CaGRAS3	13.406					2.345	2.667	1.594	3.525	9.971	7.793	6.378	5.885	3.583	3.43
CaGRAS34	0					0	0	0	0	0	0.274	0	0	0	0
CaGRAS41	16.971					21.71	14.506	17.412	9.833	19.234	18.3	32.365	8.829	11.998	10.741
CaGRAS28	2.74					4.633	4.469	2.772	4.934	1.299	7.06	6.88	4.385	3.355	3.249
CaGRAS23	1.076					0.599	0.532	0.7	3.584	6.732	8.708	3.313	2.655	1.488	0.439
CaGRAS37	2.257					8.922	5.177	4.722	3.944	13.238	17.742	8.644	14.344	5.568	4.367
CaGRAS8	10.625					12.791	12.677	16.473	15.802	21.288	22.56	16.744	20.182	22.25	17.963
CaGRAS46	1.415					7.576	5.272	7.125	0.888	3.311	7.333	5.621	10.83	5.278	5.658
CaGRAS5	6.313					41.091	42.507	48.512	10.468	7.564	28.793	27.74	24.257	30.343	25.12
CaGRAS38	19.565					14.401	15.477	15.227	19.72	36.577	24.203	29.991	21.344	13.215	13.77
CaGRAS48	16.687					10.692	8.813	11.131	4.688	4.016	12.365	9.706	12.447	13.112	10.638
CaGRAS30	1.733					0.057	0	0	6.064	2.464	0.582	0.121	1.417	0	0
CaGRAS29	20.621					58.643	48.175	51.157	42.432	58.866	132.938	148.171	137.15	146.959	75.387
CaGRAS16	10.58					26.062	18.481	41.556	10.782	13.488	16.919	9.003	13.91	16.246	18.122
		Solyc08g078800.1.1	SlGRAS34	LOC_Os07g39470.1	OsGRAS34
		Solyc08g080400.1.1	SlGRAS35	LOC_Os07g39820.1	OsGRAS35
		Solyc09g010920.1.1	SlGRAS36	LOC_Os07g40020.1	OsGRAS36
		Solyc09g018460.1.1	SlGRAS37	LOC_Os10g22430.1	OsGRAS37
		Solyc09g066450.1.1	SlGRAS38	LOC_Os10g40390.1	OsGRAS38
		Solyc10g074680.1.1	SlGRAS39	LOC_Os11g03110.1	OsGRAS39
		Solyc10g086370.1.1	SlGRAS40	LOC_Os11g04400.1	OsGRAS40
		Solyc10g086380.1.1	SlGRAS41	LOC_Os11g04570.1	OsGRAS41
		Solyc10g086530.1.1	SlGRAS42	LOC_Os11g04590.1	OsGRAS42
		Solyc11g005610.1.1	SlGRAS43	LOC_Os11g06180.1	OsGRAS43
		Solyc11g011260.1.1	SlGRAS44	LOC_Os11g11600.1	OsGRAS44
		Solyc11g012510.1.1	SlGRAS45	LOC_Os11g31100.1	OsGRAS45
		Solyc11g013150.1.1	SlGRAS46	LOC_Os11g47870.1	OsGRAS46
		Solyc11g017100.1.1	SlGRAS47	LOC_Os11g47890.1	OsGRAS47
		Solyc12g005340.1.1	SlGRAS48	LOC_Os11g47900.1	OsGRAS48
		Solyc12g049320.1.1	SlGRAS49	LOC_Os11g47910.1	OsGRAS49
		Solyc12g099220.1.1	SlGRAS50	LOC_Os11g47920.1	OsGRAS50
		Solyc12g099900.1.1	SlGRAS51	LOC_Os12g02870.1	OsGRAS51
				LOC_Os12g04200.1	OsGRAS52
				LOC_Os12g04370.1	OsGRAS53
				LOC_Os12g04380.1	OsGRAS54
				LOC_Os12g06540.1	OsGRAS55
				LOC_Os12g38490.1	OsGRAS56
