# Supplementary material for: Genome-wide characterization and expression analysis of GRAS gene family in pepper (Capsicum annuum L.)
Source: PeerJ. 2018 May 29;6:e4796. doi: 10.7717/peerj.4796 (PMC5983004; doi:10.7717/peerj.4796)
Supplement: Supplemental Information 2 [file peerj-06-4796-s002.xlsx]

## Sheet: Table S2
Table S2: The RPKM value of each gene in different tissues and development stages
Gene_id	Leaf	Root	Stem	PC_6DPA	PC_16DPA	PC_25DPA	PC_MG	PC_B	PC_B5	PC_B10	PL_6DPA	PL_16DPA	PL_25DPA	PL_MG	PL_B	PL_B5	PL_B10
CaGRAS13	0	0	0	0.09	0.174	0.247	0.701	0.657	1.655	0.523	0	0.158	0.114	0	0	0.082	0
CaGRAS15	0	0	0	0	0	0	0	0	0	0	0	0	0	0	0	0	0
CaGRAS18	0	0	0	0.066	0	0	0.057	0	0	0	0	0	0	0	0	0	0
CaGRAS21	0	0	0	0	0	0	0	0	0	0	0	0	0	0	0	0	0
CaGRAS24	0	0	0	0	0	0	0	0	0	0	0	0.409	0	0	0	0	0
CaGRAS27	0	0	0	0.113	0.327	0	0	0	0	0	0	0	0	0	0	0	0
CaGRAS36	0	0	0	0	0	0	0	0	0	0	0	0	0	0.43	0	0	0
CaGRAS39	0	0	0	0	0	0	0	0	0	0	0	0	0	0	0	0	0
CaGRAS4	0	0	0	0	0	0	0	0	0	0	0	0	0	0	0	0	0
CaGRAS42	0	0	0	0.242	0.23	0	0	0	0	0	0	0	0	0	0	0	0
CaGRAS44	0	0	0.186	0.073	0	0.069	0	0.06	0	0.102	0.112	0.109	0.675	0.128	0	0	0.083
CaGRAS50	0	0	1.147	0.076	2.627	2.904	1.994	0.311	0	0.264	0.328	4.589	3.39	1.945	1.466	0.966	1.141
CaGRAS43	1.594	0	0	0.066	0	0	0	0	0	0	0	0	0.088	0	0	0	0
CaGRAS35	1.704	0	0.433	0	0	0.37	0.34	0	0	0	0	0	0	0	0	0	0
CaGRAS49	0.088	0.081	1.025	0.068	2.081	2.67	2.974	0.22	0.19	0.153	0.107	2.47	3.513	0.998	0.925	0.815	0.85
CaGRAS20	0	0.426	0	0.867	0.278	0.524	0.28	2.807	1.503	2.871	0	0.43	0.776	2.031	0.736	2.345	4.622
CaGRAS2	2.789	0.442	0.329	0.601	2.418	0.816	2.064	2.674	0.773	1.676	1.403	0.446	0	0	0	0	0.668
CaGRAS17	0.107	0.777	0.204	0.493	0.261	0.684	0.522	0.259	0.433	0.057	0.26	0.655	1.117	1.96	0.86	0.597	0.288
CaGRAS45	0	0.812	0	0.777	0	0	0.5	0	0.051	0.146	0.192	0.226	0.082	0.275	0	0.293	0
CaGRAS47	0.072	0.913	0.423	0.119	0.063	0.162	0.051	0.049	0.155	0.269	0.356	0.487	0.075	0	0	0.054	0.139
CaGRAS1	1.823	1.483	0.105	1.436	1.335	1.581	0.35	0.149	0.079	0.465	1.544	0.474	0.121	1.193	5.539	0.894	0.227
CaGRAS7	1.662	3.472	4.86	9.5	7.715	8.565	5.225	3.618	4.108	5.627	4.382	2.28	6.13	4.497	3.634	4.554	4.839
CaGRAS12	28.705	4.435	6.864	15.5	30.843	44.473	44.487	30.782	39.339	7.851	6.882	13.262	10.938	6.505	4.797	3.394	3.702
CaGRAS9	24.436	4.483	9.845	13.71	19.001	19.054	17.934	12.241	10.505	11.808	6.784	8.864	11.043	11.279	7.83	5.445	7.089
CaGRAS40	8.448	4.614	9.983	13.003	5.793	4.359	3.265	0.962	2.414	2.327	6.754	2.206	2.974	1.864	2.215	1.919	1.35
CaGRAS19	17.395	5.276	3.85	4.222	1.092	0.944	1.473	1.336	3.082	5.791	3.794	2.162	1.853	0.867	0.782	7.182	10.817
CaGRAS31	2.509	5.798	6.306	1.225	1.665	1.853	0.985	1.637	1.608	2.246	4.113	2.325	4.283	6.735	4.378	6.817	6.645
CaGRAS10	1.893	6.176	4.734	2.43	0.475	0.404	0.127	0.182	0.061	0	1.083	1.277	1.532	2.407	1.072	0	0.083
CaGRAS3	13.406	6.214	7.649	2.703	3.514	6.014	3.249	2.345	2.667	1.594	3.525	9.971	7.793	6.378	5.885	3.583	3.43
CaGRAS34	0	6.513	0.266	0	0	0	0	0	0	0	0	0	0.274	0	0	0	0
CaGRAS41	16.971	6.558	5.978	17.35	16.721	15.522	17.006	21.71	14.506	17.412	9.833	19.234	18.3	32.365	8.829	11.998	10.741
CaGRAS28	2.74	8.957	8.941	11.422	8.027	10.683	7.919	4.633	4.469	2.772	4.934	1.299	7.06	6.88	4.385	3.355	3.249
CaGRAS23	1.076	11.213	13.708	2.072	3.963	2.583	2.535	0.599	0.532	0.7	3.584	6.732	8.708	3.313	2.655	1.488	0.439
CaGRAS37	2.257	12.596	4.705	7.379	17.302	17.57	11.778	8.922	5.177	4.722	3.944	13.238	17.742	8.644	14.344	5.568	4.367
CaGRAS8	10.625	13.038	13.689	11.01	12.981	14.193	16.224	12.791	12.677	16.473	15.802	21.288	22.56	16.744	20.182	22.25	17.963
CaGRAS46	1.415	14.007	3.559	4.954	6.82	11.149	10.161	7.576	5.272	7.125	0.888	3.311	7.333	5.621	10.83	5.278	5.658
CaGRAS5	6.313	16.579	22.875	41.145	45.699	47.258	44.906	41.091	42.507	48.512	10.468	7.564	28.793	27.74	24.257	30.343	25.12
CaGRAS38	19.565	19.429	14.419	7.422	15.139	16.818	19.183	14.401	15.477	15.227	19.72	36.577	24.203	29.991	21.344	13.215	13.77
CaGRAS48	16.687	25.598	30.432	12.18	9.402	9.162	10.307	10.692	8.813	11.131	4.688	4.016	12.365	9.706	12.447	13.112	10.638
CaGRAS30	1.733	35.574	14.987	3.175	1.893	0.951	0.185	0.057	0	0	6.064	2.464	0.582	0.121	1.417	0	0
CaGRAS29	20.621	64.206	49.796	45.076	29.905	39.185	47.15	58.643	48.175	51.157	42.432	58.866	132.938	148.171	137.15	146.959	75.387
CaGRAS16	10.58	70.883	22.476	38.502	39.18	44.339	31.879	26.062	18.481	41.556	10.782	13.488	16.919	9.003	13.91	16.246	18.122
