# Supplementary material for: Genome-wide characterization and expression analysis of GRAS gene family in pepper (Capsicum annuum L.)
Source: PeerJ. 2018 May 29;6:e4796. doi: 10.7717/peerj.4796 (PMC5983004; doi:10.7717/peerj.4796)
Supplement: Supplemental Information 3 [file peerj-06-4796-s003.xlsx]

## Sheet: Table S3
Table S3: Sequences of primers used for studies of CaGRAS expression
Gene name	Forward primer (5′→3′)	Reverse primer (5′→3′)
CaGRAS1	ACCTCAAGGTCCCAGGCTAT	TCCCTGCTCAGCATACCTCT
CaGRAS2	CTTGCAAAGGTCATTGCTCA	GTTCCGTTACCACCATGACC
CaGRAS3	CCTTCAACCCACCACTCTGT	AGAAAGCTGCCTCATGCAAT
CaGRAS4	AACAAGGGACGTGGAACTTG	GGCGATCTTCATCCGTACAT
CaGRAS5	CAATCCAAGCAAGCACAAGA	GCTGCAGCTAGGAGGATTTG
CaGRAS6	CTCAATGGCCAACTTTGCTT	GCCAATGCTTCCTCTTCTTG
CaGRAS7	CAGGGAATCGTCTTCGTGAT	CCTCGTACTCGCCTAACGTC
CaGRAS8	TGAGTGCTTCGAAACGAATG	AATCACATCGGAGGAACTCG
CaGRAS9	ATCGAGAGCAACGACTCGAC	TTAGGGCTCGGAGGAATCCA
CaGRAS10	TACTAGCATGCCCACCATCA	CACACTGTCCCATTGACCAC
CaGRAS11	CATCCGGAGGATCAGTCAAT	CGATAAGCCGCTAATTCGTC
CaGRAS12	CTGCTGCAATCACTGTTGGT	ATTGGTAACTCCAGCGGATG
CaGRAS13	GAATCCGAACCAGAACCAGA	TTAGCCTCTGGTCGGAAGAA
CaGRAS14	CCTCCGTCAAACCCTAATGA	TGTAACAGAGCAGGCCATTG
CaGRAS15	TGGAGTTCATCAACACTTGGGA	TCTTCAACCACACCACCCTT
CaGRAS16	GGATTCTGCAGGGCTGATAG	GCCAATCTCTCCATGTTGGT
CaGRAS17	GGAATCCATTCCACCAGAGA	TCCATAGTCTCCCCATGAGC
CaGRAS18	AGCGCAGAGGAGCATTGTAT	CTTTCAACATGCCGTTGATG
CaGRAS19	GGATCGTCAACGGTGCTTAT	TCGCACGCAATAACATTCAT
CaGRAS20	GGTTAGCTGCTCGTGGACTC	TTGAGGAGTTTGCAATGCTG
CaGRAS21	GAGAGCGAGAGGAGGAGGAT	CACAGATCCACACAGCCATC
CaGRAS22	AGCATCGCAGAGACCTCAAT	CATCAGGCAGTGAGTCCAGA
CaGRAS23	CTTGAGCAACGTATGCAGGA	GCTGCTGATCCACTTCTTCC
CaGRAS24	TGGGGACGAGGAAGATACAG	AGCAGCCGCAACAATAGACT
CaGRAS25	GACAGTCCAAGGGATGCTGT	TCAAAATGCAACCTCTGCTG
CaGRAS26	GCAGGAAGTGTTCGGAAGAG	CCAGCCCTGTAACATCCAGT
CaGRAS27	CCAAGCCATTTACCAAGCAT	CAAGTCTCCGTCCTGTGGAT
CaGRAS28	GAAGCACGACTTGCAATCAA	AGCATCACCGTTTCCAATTC
CaGRAS29	ATCCCATGGCATAGATTTGG	CCGATATTCGGAGTGAAGGA
CaGRAS30	TCTTCCCATGGATGACTCGGA	CATTCTCCATGGCCTCTCCA
CaGRAS31	GCAGAAGCATGCAGAAATGA	GTTTCCCCACTGCTGTCAAT
CaGRAS32	TGAGAGGTGGAGGTCACGAT	ATCGCGATTCATCCAGCCAA
CaGRAS33	TGCTGATCGTTACCCTGCAC	ACTACCCGGTGGCAATGTAG
CaGRAS34	GGTTTCAAGCCAGCAGAGAG	ATCAGCACCTCATCCCTTTG
CaGRAS35	TTCTCGGATGCAGTGTTGAG	AGGTGATGGTGGATTCTTCG
CaGRAS36	CAGTAGTGGTTACCTGGCCG	CGCCTCAGTTGTTGAGGTCT
CaGRAS37	CTACATGGCTGCAAATGGTG	AATTGCTGATAGCCGTTTGG
CaGRAS38	CCGTGAGGTCCTGTTTCATT	AAGACGAACTTGCCACTGCT
CaGRAS39	ACCATGGAGGATAGCACGTC	GTACTCCAGGAGGGATGCAA
CaGRAS40	AGAGCAACGGGTGTCTGTCT	ATCATCGCTTCCCTGATGAC
CaGRAS41	GACTCGTTGGAAAGCTCGTC	CCGGCTGAACTCAATCTAGC
CaGRAS42	TGGAGTGACGGGCTTTATTC	TGTCAAAGGCCTTGATTTCC
CaGRAS43	GCTTTGCTGAGTCCTTCCAC	CTCGACCTCTGCAACAATCA
CaGRAS44	GACTTAAGCGCTCGTCCTGA	TGAGCAAGAAGGGTGTGCAA
CaGRAS45	AATGGCATCACCCTATGGAA	TGGACTCTGTCTCGACGATG
CaGRAS46	ATGGTCTTGAGGCAAGGATG	ACCCCACATAATGCCAATGT
CaGRAS47	GAGAGCGAGAGGAGGAGGAT	CACAGATCCACACAGCCATC
CaGRAS48	GAGGTCTTGGATGGGTTTGA	CTGGTCATGTGTGGAAGGTG
CaGRAS49	GAGGATACACGCGAACGATT	CTTGGCTGGTTGCACTAACA
CaGRAS50	TCGCGCGATATGGTATGGAG	GTGCAACAACTCCCACAAGC
actin1	GGTGACGAGGCTCAATCCAA	CTCTGGAGCCACACGAAGTT
