# Supplementary material for: Genome-wide characterization and expression analysis of GRAS gene family in pepper (Capsicum annuum L.)
Source: PeerJ. 2018 May 29;6:e4796. doi: 10.7717/peerj.4796 (PMC5983004; doi:10.7717/peerj.4796)
Supplement: Supplemental Information 4 [file peerj-06-4796-s004.xlsx]

## Sheet: Table S4
Table S4: Cis-elements analysis of pepper GRAS genes
Gene name	GARE	ABRE	ARE	CGTCA-motif	MBS	HSE	TCA-element	TGACG-motif	W-Box
CaGRAS1	√
CaGRAS2	√		√				√	√
CaGRAS3	√		√	√	√				√
CaGRAS4	√	√				√		√
CaGRAS5		√	√			√
CaGRAS6			√	√	√	√	√	√
CaGRAS7		√	√	√		√	√
CaGRAS8	√				√		√
CaGRAS9		√		√	√	√
CaGRAS10	√	√		√	√	√	√	√
CaGRAS11
CaGRAS12		√	√	√		√		√	√
CaGRAS13	√		√		√	√	√
CaGRAS14		√	√		√	√	√
CaGRAS15
CaGRAS16			√	√	√	√	√	√
CaGRAS17	√		√	√	√	√	√	√
CaGRAS18	√		√	√	√		√	√	√
CaGRAS19	√	√		√	√			√
CaGRAS20		√	√		√		√
CaGRAS21			√		√
CaGRAS22		√		√	√		√
CaGRAS23				√	√	√	√	√	√
CaGRAS24		√		√	√	√	√
CaGRAS25			√	√			√	√
CaGRAS26			√	√		√		√
CaGRAS27	√		√		√		√
CaGRAS28	√	√	√		√	√	√		√
CaGRAS29		√	√	√	√	√
CaGRAS30			√	√		√	√	√
CaGRAS31		√			√				√
CaGRAS32								√
CaGRAS33		√	√	√	√			√	√
CaGRAS34		√	√	√	√		√	√
CaGRAS35		√	√				√		√
CaGRAS36	√	√	√				√		√
CaGRAS37	√	√		√		√	√
CaGRAS38	√	√		√	√	√	√	√
CaGRAS39	√			√	√		√		√
CaGRAS40					√		√
CaGRAS41	√		√						√
CaGRAS42			√				√	√
CaGRAS43					√			√
CaGRAS44	√		√					√
CaGRAS45			√
CaGRAS46		√		√				√	√
CaGRAS47			√		√
CaGRAS48				√		√	√	√
CaGRAS49			√						√
CaGRAS50				√	√		√	√
Note: GARE is GA response element; ABRE is ABA-responsive element; ARE is anaerobic responsive element; CGTCA-motif is Methyl Jasmonate-responsive element; HSE is heat shock element; TCA-element is salicylic acid responsive element; TGACG-motif is jasmonic acid responsive element; W-box is WRKY binding site; MBS is drought stress response element; EIRE is elicitor-responsive element.
